# Supplementary material
Source: PubMed Central journal article supplement (PMC7757003)
Supplement: advancesADV2020002504-suppl1.pdf [file advancesADV2020002504-suppl1.pdf]

Supporting information for:

**CD11c regulates hematopoietic stem and progenitor cells under stress**

Short title: CD11c and HSPCs

Lifei Hou, Richard A. Voit, Vijay G. Sankaran, Timothy A. Springer, Koichi Yuki.

Corresponding author: Koichi Yuki, M.D.

Email: [koichi.yuki@childrens.harvard.edu](mailto:koichi.yuki@childrens.harvard.edu)

This supplementary material includes the following:

Supplemental Figure 1-3, supplemental Table 1

## Supplementary Figures.

### Supplemental Figure 1.

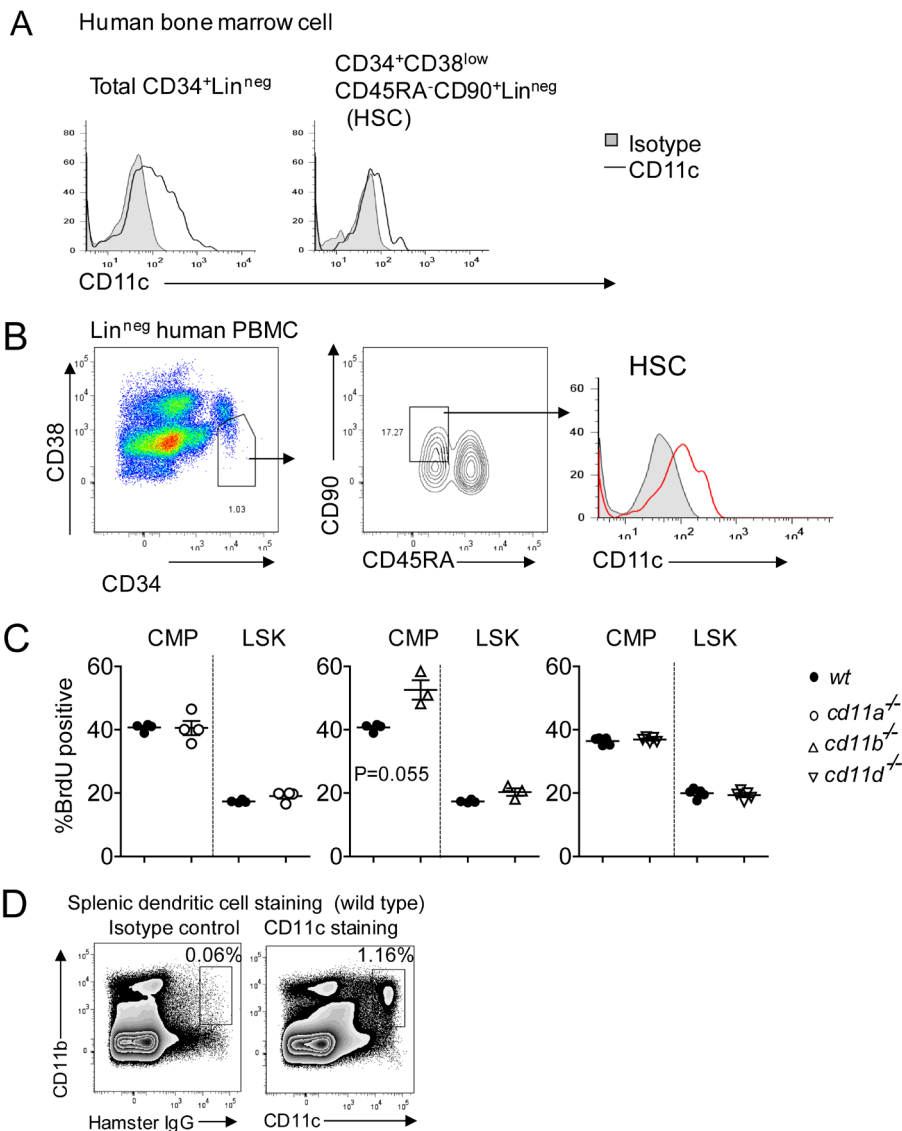

### Supplemental Figure 1. CD11c expression profiles in human bone marrow cells and proliferation of naïve $\beta 2$ integrin<sup>-/-</sup> mice

- (A) The expression of CD11c on human bone marrow HSC.
- (B) The expression of CD11c on human peripheral blood HSC. At the most right, Red line indicates anti-CD11c antibody, and black line indicates isotype control.
- (C) BrdU incorporation analysis. All of WT, CD11a<sup>-/-</sup>, CD11b<sup>-/-</sup>, and CD11d<sup>-/-</sup> mice were pulsed with BrdU for 4 hours, and then were analyzed for BrdU incorporation in the Lineage<sup>negative</sup> bone marrow cells. Symbols indicate individual mice. Depicted data are mean ± SEM. Shown is the representative of two experiments with the same pattern. Student's t-test was used for statistical analysis.
- (D) CD11c staining of splenic dendritic cells of wild type mice. Shown are representative flow cytometry plots from at least 3 independent experiments with the same pattern.

Supplemental Figure 2.

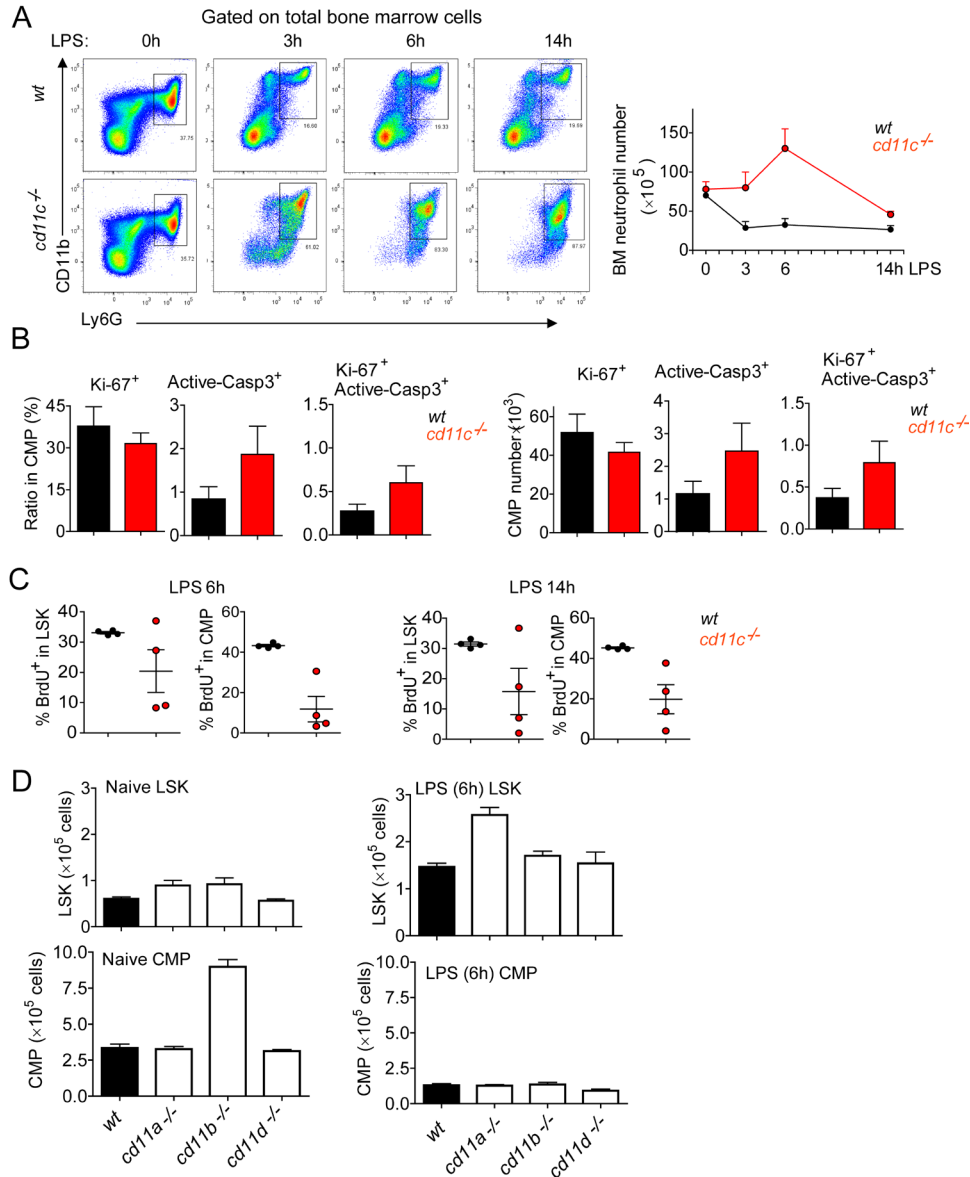

**Supplemental Figure 2.** LSK and CMP of  $\beta 2$  integrin member<sup>-/-</sup> mice subjected to systemic LPS injection

- (A) Left: representative flow cytometry plot showing BM neutrophil at different time points post LPS injection (*i.v.* 10 mg/kg). Right: Dynamics of BM neutrophil numbers of WT and CD11c<sup>-/-</sup> mice after LPS injection. Data were shown as mean  $\pm$  S.E.M of 3-6 mice per group per time point.
- (B) Both WT and CD11c<sup>-/-</sup> mice were euthanized at 3 hours after LPS injection. Frequency (left-panel) and absolute number (right-panel) of Ki67<sup>+</sup>, active-caspase3<sup>+</sup>, and Ki67<sup>+</sup>/active-caspase 3<sup>+</sup> in CMPs
- (C) Frequency of BrdU<sup>+</sup> LSK and CMP cells in WT and CD11c<sup>-/-</sup> mice at 6h and 14h after LPS injection (*i.v.* 10 mg/kg). Data are representative of two experiments. Symbols represent individual mice. Data were shown as mean  $\pm$  SEM.
- (D) The number of LSK and CMP of naïve and LPS injected mice. We examined in WT, CD11a<sup>-/-</sup>, CD11b<sup>-/-</sup> and CD11d<sup>-/-</sup> mice. Data were shown as mean  $\pm$  SEM.

# Supplemental Figure 3

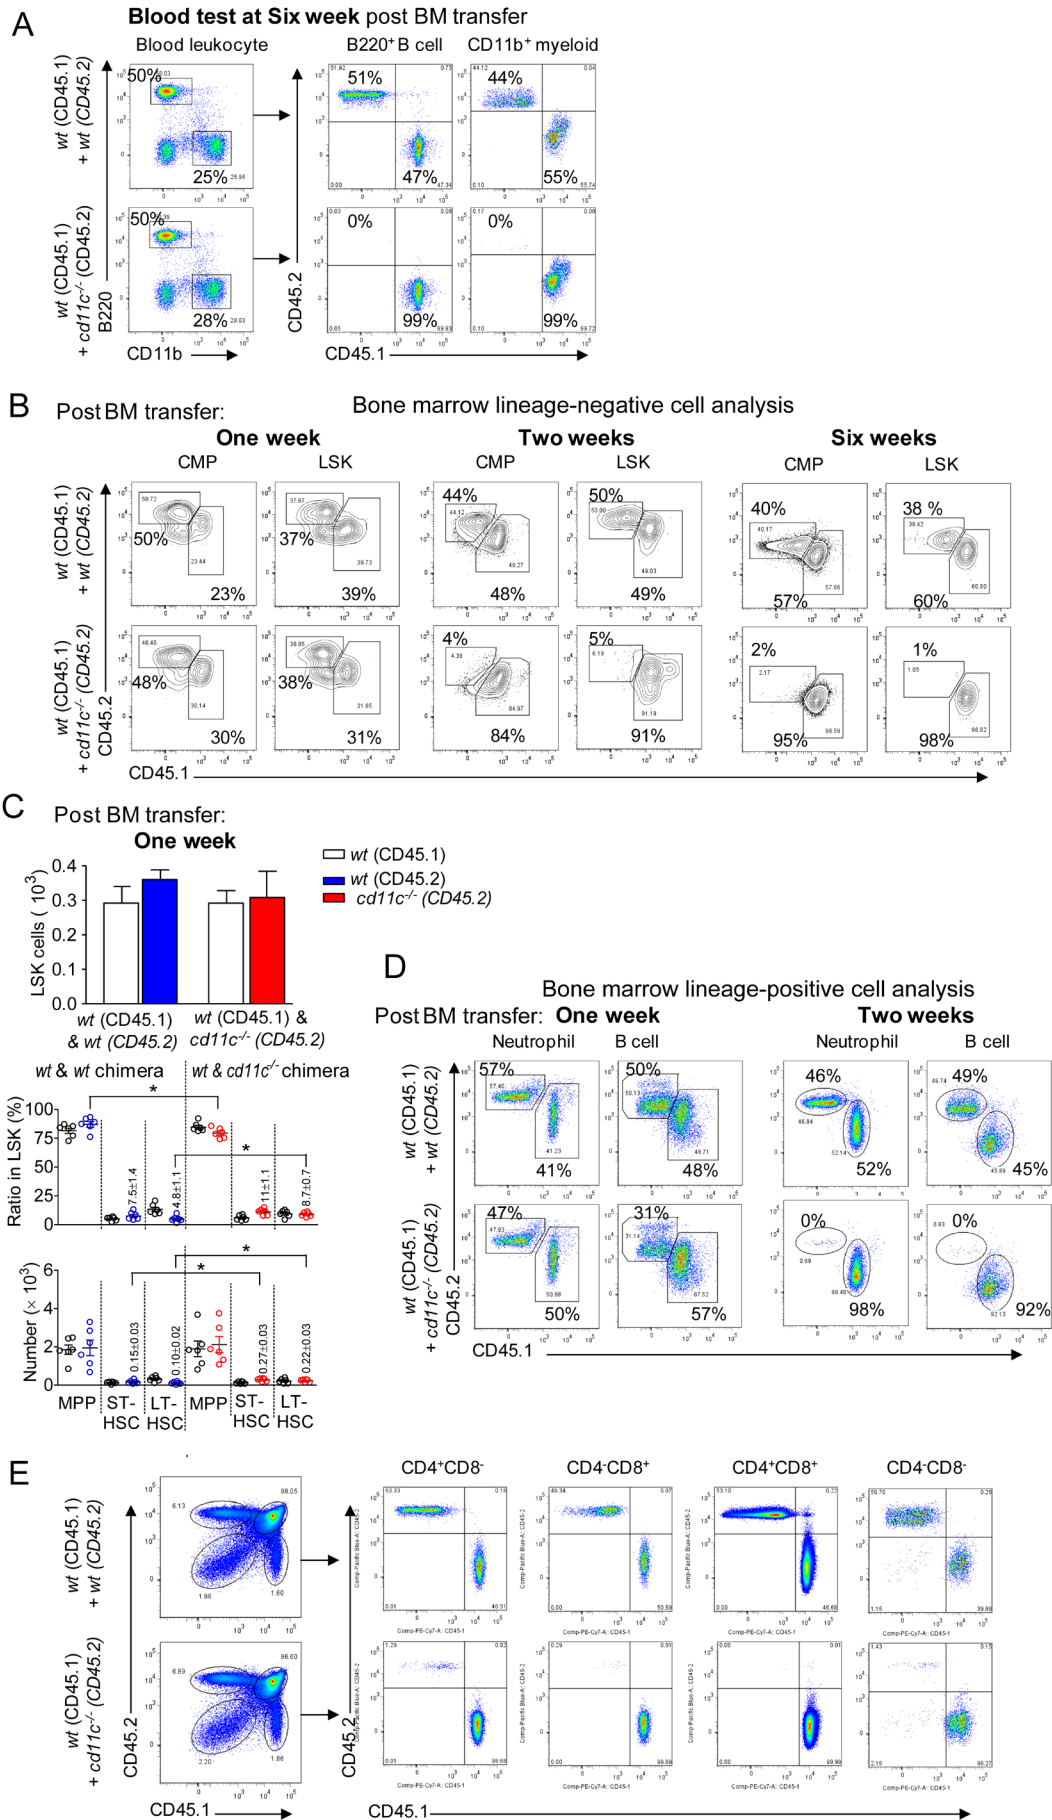

**Supplemental Figure 3.** CD11c does not affect homing of bone marrow cells.

Chimeric mice were made by transplanting the mixture of CD45.1 WT and CD45.2 WT bone marrow (BM) cells or CD45.1 WT and CD45.2 CD11c<sup>-/-</sup> BM cells at the ratio of 1:1 into lethally irradiated recipient mice.

- (A) At 6 weeks post BM transplantation, peripheral blood from recipient mice was collected and subjected to flow cytometry analysis. Shown are representative of 5 mice in both groups.
- (B) BM cells from recipient mice at 1, 2, and 6 weeks post BM transplantation were collected and subjected to flow cytometry analysis. Shown are representative flow cytometry plots of LSKs and CMPs from different originations differentiated by congenic markers. N=5 in each time point; experiment was repeated at least three times with exactly the same pattern.
- (C) Up panel: Cell number showing that WT(CD45.1)/WT(CD45.2) and WT(CD45.1)/CD11c<sup>-/-</sup> (CD45.2) chimeras have the comparable LSK cell constitution at one week after bone marrow transplantation. Experiments were repeated three times with the same pattern. Bottom Panel: LSK cells were further analyzed for MPP, ST-HSC and LT-HSC by staining CD150 and CD48. Symbol indicates individual mouse. Statistical analysis was performed using one-way ANOVA with *post hoc* Bonferroni analysis. \*p<0.05.
- (D) FACS plots of bone marrow neutrophil and B cells in WT(CD45.1)/WT(CD45.2) and WT(CD45.1)/CD11c<sup>-/-</sup>(CD45.2) chimeras at 1 and 2 weeks after BM transplantation. Shown are representative of 5 mice in both groups. Experiments were repeated three times with the same pattern.
- (E) FACS plots of thymus of WT(CD45.1)/WT(CD45.2) and WT(CD45.1)/CD11c<sup>-/-</sup> (CD45.2) chimeras at 12 weeks after bone marrow transplantation. Shown are representative of 5 mice in both groups.

Supplemental Table 1. The list of up-and down-regulated genes in CD11c<sup>-/-</sup> LSK cells

| Naïve LSK   |               | LPS stimulated LSK |               |               |               |          |          |
|-------------|---------------|--------------------|---------------|---------------|---------------|----------|----------|
| Upregulated | Downregulated | Upregulated        | Downregulated |               |               |          |          |
| Efcab7      | Ighv6-4       | Ighv5-17           | F8a           | Mfn1          | Atp13a1       | Lrfr1    | Pik3cb   |
| Timp3       | Igkv10-95     | Ighv1-59           | Trp53rka      | Syt2          | Med25         | Fam208a  | Tnfrsf11 |
| Fcna        | Igkv9-129     | Igfv3              | Hace1         | B3galt6       | Ighv5-9-1     | Hnrnp1   | Med16    |
| Hba-a2      | Igkv3-5       | Ighv14-4           | Slc19a2       | Smyd2         | Dynll2        | Zbtb45   | Chn2     |
| C1qc        | mt-Nd3        | Igkv4-70           | Spata51       | Klh42         | St3gal5       | Coro2a   | Rala     |
| Ltbp1       | Icos          | Ighv1-58           | Tmem221       | Gm15975       | 1700066M21Rik | Crybg1   | Ap2a2    |
| Mrc1        | Gm31172       | Ighv7-4            | Dtwd2         | Atp10a        | Ccdc102a      | Notch2   | Pgls     |
| Wfdc21      | Ighv3-8       | Ighv1-62-2         | Gpr180        | Pitpna        | Ppa2          | Fmn13    | Ubr2     |
| Igkv6-20    | Stab2         | Il17f              | Fgfr1         | Mpnd          | Trp53rkb      | Chchd10  | Dnttip1  |
| Lhfp        | Cd28          | Ighv1-22           | Nenf          | Zfp12         | Sh3kbp1       | Stk35    | Slc25a39 |
| Igkv4-69    | Ilkzf3        | Igkv6-23           | Fut11         | Thap11        | Prr5          | Ino80b   | Ccni     |
| Trem1       | Pxdc1         | Igkv4-68           | B3gnt2        | Brf1          | Snx9          | Tbc1d20  | Ctdnep1  |
| Podxl       | Ighv1-5       | Ighv7-1            | Phf13         | Bri3bp        | Cnot11        | Mdfic    | Ttc14    |
| Xcr1        | A530040E14Rik | Igic2              | Lrrfp2        | Asf1a         | Elf5          | Susd6    |          |
| Dmkn        | Cnbd2         | Ighv1-82           | Cry1          | Ubac1         | Fam174b       | Ptges2   |          |
| Igkv4-92    | Igkv4-63      | Hspb1              | Egr1          | D130058E05Rik | Malt1         | Gm45294  |          |
| Rhag        | Ighv5-15      | C3                 | 2300009A05Rik | Mcoln1        | Mpped2        | Fbxw2    |          |
| Tlr8        | Rgs8          | Ido1               | Nsmce3        | Ppm1g         | Tef           | Ptk7     |          |
| Igll1       | Hist1h3f      | Ighv1-39           | C2cd2         | Flvcr1        | Dnajc1        | Snip1    |          |
| Fndc7       | Gm32554       | G530011O06Rik      | 2-Mar         | Tesmin        | Edem3         | Ip6k1    |          |
| Apol7c      | Ighv9-4       | Cd209a             | 2410022M11Rik | Prmt3         | Ptger4        | Lmo2     |          |
| Tlr11       | Rasgrp3       | Clca3a1            | Sdccag3       | Ighv4-1       | Smarca2       | Ccna2    |          |
| Sptb        | Skap1         | Saa3               | Acot1         | E2f4          | Jun           | Wtap     |          |
| Kcnj5       | Igkv6-13      | Mmp13              | Gpt2          | Map3k6        | Myef2         | Gspt1    |          |
| Ighv9-2     | Gm11342       | Steap4             | Rab2a         | Fam105a       | Hgh1          | Sema4b   |          |
| Siglec1     | NA            | Ccl12              | Clasp2        | Pmp22         | Gm43672       | Tcp1111  |          |
|             | Slc7a3        | Ighv6-6            | Mcu           | Kctd13        | Usp22         | Carmil2  |          |
|             | Tmtc1         | Gm28438            | Mybl2         | Pgrmc2        | Hmgxb3        | Gfer     |          |
|             | Ighv4-2       | Ighv1-26           | Cdk9          | Emilin2       | Rbm17         | Eid1     |          |
|             | Ighv1-67      | C4b                | Gmcl1         | Gpam          | Samd10        | Mfsd12   |          |
|             | Xlr3a         | Hp                 | Fam13b        | Smcp2         | Igll1         | Slc25a25 |          |
|             | Lrrc27        | Epha4              | Slc25a1       | Hccs          | Agpat2        | Vamp2    |          |
|             | Pkdrej        | Zbtb32             | Bola3         | Specc11       | Gm24270       | Camsap3  |          |
|             | Trp53cor1     | Cp                 | Acsl3         | Zfp292        | Zfp367        | Rwdd1    |          |
|             | D830025C05Rik | Ighv10-1           | Atg2b         | Arhgap10      | Dhcr24        | Plekhf2  |          |
|             | Xlr3b         | Ighv1-84           | Tiparp        | Man1a         | Bckdhh        | Cep131   |          |
|             | Rorc          | Il33               | Ube2j2        | Gtf3a         | Cog3          | Ei24     |          |
|             | Ighg3         | Sipa1              | Sipa1         | Afg3l2        | Rab22a        | B4galt1  |          |
